# Supplementary material for: Molecular Characterization of New Haplotype of Genus Sarcocystis in Seabirds from Magdalena Island, Southern Chile
Source: PubMed Central journal article supplement (PMC7909292; doi:10.3390/ani11020245), 2021-01-20
Supplement: animals-11-00245-s001.pdf [file animals-11-00245-s001.pdf]

Table S1. Results from BLAST search using sequences of ITS1, COX1 and 18S of *Sarcocystis* sp. ex *Stercorarius chilensis*

| Locus | Genbank number         | Species                                                        | Percent identity | N° gaps | N° of nucleotide substitutions | Sequences obtained from:    |                                            |
|-------|------------------------|----------------------------------------------------------------|------------------|---------|--------------------------------|-----------------------------|--------------------------------------------|
|       |                        |                                                                |                  |         |                                | Definitive host             | Intermediate host                          |
| 18S   | MH130211.1; MF946587.1 | <i>Sarcocystis halietai</i>                                    | 99.74%           | 0       | 2                              | <i>Haliaeetus albicilla</i> | <i>Phalacrocorax carbo</i>                 |
| 18S   | KY348753.1             | <i>Sarcocystis</i> sp. ex <i>Accipiter cooperii</i>            | 99.74%           | 0       | 2                              | <i>Accipiter cooperii</i>   |                                            |
| 18S   | JQ733511.1             | <i>Sarcocystis</i> sp. ex <i>Phalacrocorax carbo</i> is. Dkom1 | 99.74%           | 0       | 2                              | Unknown                     | <i>Phalacrocorax carbo</i>                 |
| 18S   | GQ245670.1             | <i>Sarcocystis</i> sp. ex <i>Columba livia</i>                 | 99.74%           | 0       | 2                              | Unknown                     | <i>Columba livia</i>                       |
| 18S   | EU502869.2             | <i>Sarcocystis</i> sp. ex <i>Anser albifrons</i> is. 09        | 99.74%           | 0       | 2                              | Unknown                     | <i>Anser albifrons</i>                     |
| 18S   | EU810398.1             | <i>Sarcocystis</i> sp. CH1918-03                               | 99.74%           | 0       | 2                              | <i>Accipiter cooperii</i>   |                                            |
| 18S   | MG273671.1             | <i>Sarcocystis fulicae</i>                                     | 99.62%           | 0       | 3                              | Unknown                     | <i>Fulica atra</i>                         |
| 18S   | JN256117.1             | <i>Sarcocystis corvusi</i>                                     | 99.62%           | 0       | 3                              | Unknown                     | <i>Corvus monedula</i>                     |
| 18S   | GU187943.1             | <i>Sarcocystis</i> sp. MK-2010                                 | 99.62%           | 0       | 3                              | Unknown                     | <i>Nyctereutes procyonoides viverrinus</i> |
| 18S   | HM125054.1; GU253883.1 | <i>Sarcocystis columbae</i>                                    | 99.62%           | 0       | 3                              |                             | <i>Columba palumbus</i>                    |
| 18S   | EU810399.1             | <i>Sarcocystis</i> sp. CH327-04                                | 99.62%           | 0       | 3                              | <i>Accipiter cooperii</i>   | Unknown                                    |
| 18S   | EU810397.1             | <i>Sarcocystis</i> sp. CH255-04                                | 99.62%           | 0       | 3                              | <i>Accipiter cooperii</i>   | Unknown                                    |
| 18S   | KY994649.1             | <i>Sarcocystis jamaicensis</i>                                 | 99.49%           | 0       | 4                              | <i>Buteo jamaicensis</i>    | Unknown                                    |
| 18S   | EU810402.1             | <i>Sarcocystis</i> sp. CH13-04                                 | 99.49%           | 0       | 4                              | <i>Accipiter cooperii</i>   | Unknown                                    |
| 18S   | KM362428.1             | <i>Sarcocystis</i> sp. 1 SN-2013                               | 99.49%           | 0       | 4                              | Unknown                     | <i>Canis familiaris</i>                    |
| 18S   | JF975681.1             | <i>Sarcocystis turdusi</i>                                     | 99.49%           | 0       | 4                              | Unknown                     | <i>Turdus merula</i>                       |
| 18S   | GU253884.1             | <i>Sarcocystis</i> sp. ex <i>Accipiter nisus</i>               | 99.49%           | 0       | 4                              | <i>Accipiter nisus</i>      | Unknown                                    |
| 18S   | EU810401.1             | <i>Sarcocystis</i> sp. CH318-04                                | 99.49%           | 0       | 4                              | <i>Accipiter cooperii</i>   | Unknown                                    |
| 18S   | EU810395.1             | <i>Sarcocystis</i> sp. RTH378-04                               | 99.49%           | 0       | 4                              | <i>Buteo jamaicensis</i>    | Unknown                                    |
| 18S   | MF946588.1; JQ733508.1 | <i>Sarcocystis lari</i>                                        | 99.36%           | 0       | 5                              | <i>Haliaeetus albicilla</i> | <i>Larus marinus</i>                       |
| 18S   | JN256677.1             | <i>Sarcocystis</i> sp. CO1                                     | 99.36%           | 0       | 5                              | Unknown                     | <i>Canis familiaris</i>                    |

|      |                                                                                                     |                                                     |         |   |   |                              |                                                                                                                               |
|------|-----------------------------------------------------------------------------------------------------|-----------------------------------------------------|---------|---|---|------------------------------|-------------------------------------------------------------------------------------------------------------------------------|
| 18S  | EU810396.1                                                                                          | <i>Sarcocystis</i> sp. RH168-04                     | 99.36%  | 0 | 5 | <i>Buteo lineatus</i>        |                                                                                                                               |
| 18S  | MT036251.1; MT036248.1                                                                              | <i>Sarcocystis lutrae</i>                           | 99.23%  | 1 | 6 | Unknown                      | <i>Nyctereutes procyonoides</i>                                                                                               |
| 18S  | MN169125.1                                                                                          | <i>Sarcocystis neurona</i>                          | 99.23%  | 0 | 6 | Unknown                      | <i>Felis domesticus</i>                                                                                                       |
| 18S  | MF596215.1.-MF596216.1;<br>MG372102.1-MG372103.1;<br>MG272286.1-MG272295.1                          | <i>Sarcocystis lutrae</i>                           | 99.23%  | 1 | 6 |                              | <i>Not specified</i><br><i>Lutra lutra, Meles meles</i><br><i>Mustelidae</i>                                                  |
| 18S  | KX470746.1                                                                                          | <i>Sarcocystis</i> sp. isolate 5                    | 99.23%  | 0 | 6 | <i>Didelphis aurita</i>      | Unknown                                                                                                                       |
| 18S  | KT207459.1                                                                                          | <i>Sarcocystis speeri</i>                           | 99.23%  | 0 | 6 | <i>Didelphis albiventris</i> | Unknown                                                                                                                       |
| 18S  | KM657769.1                                                                                          | <i>Sarcocystis lutrae</i>                           | 99.23%  | 1 | 6 | Unknown                      | <i>Lutra lutra</i>                                                                                                            |
| 18S  | EU810400.1                                                                                          | <i>Sarcocystis</i> sp. CH47-04                      | 99.23%  | 0 | 6 | <i>Accipiter cooperii</i>    |                                                                                                                               |
| 18S  | KP681854.1                                                                                          | <i>Sarcocystis speeri</i>                           | 99.11%  | 0 | 7 | Unknown                      |                                                                                                                               |
| 18S  | MK803217.1                                                                                          | <i>Sarcocystis</i> sp. isolate Sarco-BA1            | 99.11%  | 0 | 7 | <i>Didelphis spp.</i>        |                                                                                                                               |
| 18S  | MH626537.1                                                                                          | <i>Sarcosytis falcata</i>                           | 99.11%  | 0 | 7 |                              | <i>Trichoglossus moluccanus</i>                                                                                               |
| 18S  | KX610767.1-KX610769.1                                                                               | <i>Sarcocystis</i> sp. isolate B200                 | 99.11%  | 0 | 7 | <i>Didelphis spp.</i>        |                                                                                                                               |
| 18S  | AF009245.1                                                                                          | <i>Frenkelia glareoli</i>                           | 99.11%  | 0 | 7 | Unknown                      | <i>Clethrionomys glareolus</i>                                                                                                |
| 18S  | KJ957839.1                                                                                          | <i>Sarcocystis neurona</i>                          | 99.11%  | 0 | 7 | Unknown                      | <i>Canis familiaris</i>                                                                                                       |
| 18S  | EU553478.2                                                                                          | <i>Sarcocystis cornixi</i>                          | 98.98%  | 2 | 8 | Unknown                      | <i>Corvus cornix</i>                                                                                                          |
|      |                                                                                                     |                                                     |         |   |   |                              |                                                                                                                               |
| COX1 | MH138314.1                                                                                          | <i>Sarcocystis corvusi</i>                          | 100.00% | 0 | 0 | Unknown                      |                                                                                                                               |
| COX1 | MH138312.1                                                                                          | <i>Sarcocystis columbae</i>                         | 100.00% | 0 | 0 | Unknown                      |                                                                                                                               |
| COX1 | MH138308.1-MH138309.1;<br>MF946583.1                                                                | <i>Sarcocystis halietai</i>                         | 100.00% | 0 | 0 | <i>Haliaeetus albicilla</i>  | <i>Phalacrocorax carbo</i>                                                                                                    |
| COX1 | MH138316.1                                                                                          | <i>Sarcocystis fulicae</i>                          | 99.82%  | 0 | 1 | Unknown                      | <i>Fulica atra</i>                                                                                                            |
| COX1 | MH138315.1                                                                                          | <i>Sarcocystis wobeseri</i>                         | 99.82%  | 0 | 1 | Unknown                      |                                                                                                                               |
| COX1 | MH138313.1                                                                                          | <i>Sarcocystis cornixi</i>                          | 99.82%  | 0 | 1 |                              | <i>Corvus cornix</i>                                                                                                          |
| COX1 | KY348756.1                                                                                          | <i>Sarcocystis</i> sp. ex <i>Accipiter cooperii</i> | 99.82%  | 0 | 1 | <i>Accipiter cooperii</i>    |                                                                                                                               |
| COX1 | MT036254.1; MT036250.1;<br>MG273661.1-MG273670.1;<br>MF596284.1-MF596285;<br>MG372106.1-MG372107.1; | <i>Sarcocystis lutrae</i>                           | 99.63%  | 0 | 2 | Unknown                      | <i>Nyctereutes procyonoides,</i><br><i>Procyon lotor</i><br><i>Neovison vison, Martes</i><br><i>foina, Meles meles, Lutra</i> |

|      |                                      |                                                                        |        |    |     |                             |                                                                        |
|------|--------------------------------------|------------------------------------------------------------------------|--------|----|-----|-----------------------------|------------------------------------------------------------------------|
|      | KF601326.1                           |                                                                        |        |    |     |                             | <i>lutra, Mustela putorius, Vulpes lagopus</i>                         |
| COX1 | MF596283.1-MF946584.1                | <i>Sarcocystis lari</i>                                                | 99.63% | 0  | 2   | Unknown                     | <i>Larus marinus</i>                                                   |
| COX1 | KT588511.1-KT588518.1                | <i>Sarcocystis turdusi</i>                                             | 99.63% | 0  | 2   | Unknown                     | <i>Turdidae, Muscipidae</i>                                            |
| COX1 | KY994652.1                           | <i>Sarcocystis jamaicensis</i>                                         | 99.45% | 0  | 3   | <i>Buteo jamaicensis</i>    | Unknown                                                                |
| COX1 | MF162317.1                           | <i>Sarcocystis</i> sp. SKV-2017a                                       | 99.09% | 0  | 5   | <i>Strix varia</i>          | Unknown                                                                |
| COX1 | MH469240.1                           | <i>Sarcocystis caninum</i>                                             | 98.72% | 0  | 7   | Unknown                     | <i>Canis familiaris</i>                                                |
|      |                                      |                                                                        |        |    |     |                             |                                                                        |
| ITS1 | MN450340.1-MF450341.1;<br>MH130209.1 | <i>Sarcocystis halietae</i>                                            | 96.22% | 0  | 31  | Unknown                     | <i>Larus argentatus</i><br><i>Phalacrocorax carbo</i>                  |
| ITS1 | JQ733513.1                           | <i>Sarcocystis</i> sp. ex <i>Phalacrocorax carbo</i><br>isolate Dkorm1 | 96.22% | 1  | 31  | Unknown                     | <i>Phalacrocorax carbo</i>                                             |
| ITS1 | MN450342.1-MN450356.1;<br>MF946589.1 | <i>Sarcocystis halietae</i>                                            | 96.10% | 0  | 32  | <i>Haliaeetus albicilla</i> | <i>Larus argentatus</i>                                                |
| ITS1 | MF946590.1; MF946593.1               | <i>Sarcocystis halietae</i>                                            | 95.98% | 0  | 33  | <i>Haliaeetus albicilla</i> | Unknown                                                                |
| ITS1 | MF946596.1                           | <i>Sarcocystis halietae</i>                                            | 95.85% | 2  | 34  | <i>Haliaeetus albicilla</i> | Unknown                                                                |
| ITS1 | MF946591.1-MF946592.1                | <i>Sarcocystis halietae</i>                                            | 95.73% | 0  | 35  | <i>Haliaeetus albicilla</i> | Unknown                                                                |
| ITS1 | MF946594.1-MF946595.1                | <i>Sarcocystis halietae</i>                                            | 95.61% | 0  | 36  | <i>Haliaeetus albicilla</i> | Unknown                                                                |
| ITS1 | KY348755.1                           | <i>Sarcocystis</i> sp. ex <i>Accipiter cooperii</i>                    | 92.95% | 4  | 58  | <i>Accipiter cooperii</i>   | Unknown                                                                |
| ITS1 | MN450338.1-MN450339.1;<br>GU253885.1 | <i>Sarcocystis columbae</i>                                            | 91.99% | 5  | 66  | Unknown                     | <i>Larus argentatus</i><br><i>Columba palumbus</i>                     |
| ITS1 | HM125052.1                           | <i>Sarcocystis columbae</i>                                            | 91.87% | 6  | 67  | Unknown                     | <i>Columba palumbus</i>                                                |
| ITS1 | JN256119.1                           | <i>Sarcocystis corvusi</i>                                             | 91.06% | 8  | 74  | Unknown                     | <i>Corvus monedula</i>                                                 |
| ITS1 | FJ232948.1                           | <i>Sarcocystis</i> sp. ex <i>Columba livia</i>                         | 83.89% | 27 | 134 | Unknown                     | <i>Columba livia</i>                                                   |
| ITS1 | KC733715.1-KC733718.1                | <i>Sarcocystis calchasi</i>                                            | 83.69% | 29 | 136 | Unknown                     | Psittacidae                                                            |
| ITS1 | MN450370.1-MN450373.1;<br>HM159421.1 | <i>Sarcocystis wobeseri</i>                                            | 83.55% | 35 | 138 | Unknown                     | <i>Larus argentatus</i>                                                |
| ITS1 | MN450365.1-MN450369.1;<br>GU475111.1 | <i>Sarcocystis wobeseri</i>                                            | 83.43% | 35 | 139 | Unknown                     | <i>Larus argentatus</i><br><i>Anas platyrhynchos, Branta leucopsis</i> |

|      |            |                             |        |    |     |         |                           |
|------|------------|-----------------------------|--------|----|-----|---------|---------------------------|
| ITS1 | JN256121.1 | <i>Sarcocystis wobeseri</i> | 83.31% | 35 | 140 | Unknown | <i>Anas platyrhynchos</i> |
|------|------------|-----------------------------|--------|----|-----|---------|---------------------------|
